# Supplementary material for: S2-alar-iliac screw and S1 pedicle screw fixation for the treatment of non-osteoporotic sacral fractures: a finite element study
Source: Springer Nature journal article supplement (doi:10.1186/s13018-021-02805-8), 2021-10-30
Supplement: MOESM1 [file 19814166]

## Additional file 1

### The calculation formula of relative displacement and change in relative displacement

1. Mark the observation point on the inner side of the fracture line as 1a, and mark the observation point on the outer side of the fracture line as 1b.

2. After 500N vertical loading, point 1 is displaced on the X, Y, and Z axes respectively. The displacement of point 1a (the positive and negative signs represent different displacement directions) is marked as (X1a.Y1a.Z1a), and the coordinates of point 1b are marked as (X1b.Y1b.Z1b).

3. Therefore, the calculation formula for the relative displacement (RD) of position 1 in the standing is:  $RD = \sqrt{[(X1_a - X1_b)^2 + (Y1_a - Y1_b)^2 + (Z1_a - Z1_b)^2]}$

4. In the flexion movement, point 1 is displaced again on the X, Y and Z axes respectively, the coordinate of point 1a is changed and the mark is 1a' (X1a'.Y1a'.Z1a'), and the coordinate of point 1b is changed. It is 1b' (X1b'.Y1b'.Z1b'). Compared with standing, the relative displacement of the medial point of the fracture line in space is marked as A (X1a'- X1a. Y1a'- Y1a. Z1a'- Z1a), and the relative displacement of the corresponding outer point of the fracture line in space is marked as B (X1b'- X1b. Y1b'- Y1b. Z1b'- Z1b).

5. The calculation formula for the change in relative displacement ( $\Delta RD$ ) of flexion relative to standing at point 1 is:

$$\Delta RD = \sqrt{[(XA - XB)^2 + (YA - YB)^2 + (ZA - ZB)^2]}$$

Expanding the above formula is:  $\Delta RD$

$$= \sqrt{[(X1b' - X1b) - (X1a' - X1a)]^2 + [(Y1b' - Y1b) - (Y1a' - Y1a)]^2 + [(Z1b' - Z1b) - (Z1a' - Z1a)]^2}$$

6. By analogy, calculate the RD and  $\Delta$ RD of other points respectively.

Note: The RD and  $\Delta$ RD methods are different, and the actual meanings they represent are also different. The former represents the total displacement of a point, and the latter represents an increment or decrement. When the RD and  $\Delta$ RD are both small, it can better show that this kind of fixing method has the best stability performance.
