# Supplementary material for: S2-alar-iliac screw and S1 pedicle screw fixation for the treatment of non-osteoporotic sacral fractures: a finite element study
Source: Springer Nature journal article supplement (doi:10.1186/s13018-021-02805-8), 2021-10-30
Supplement: MOESM2 [file 19814166]

**Additional file 2****Relative displacement in standing**

|                |               |               |               |               |
|----------------|---------------|---------------|---------------|---------------|
| <b>LPF</b>     | 1             | 2             | 3             | 4             |
| Xa             | -0.1106       | -0.0640       | -0.0538       | 0.0288        |
| Xb             | -0.1212       | -0.0784       | -0.0606       | -0.0369       |
| RDx(leftward)  | 0.0106        | 0.0144        | 0.0068        | 0.0657        |
| Ya             | 1.2156        | 0.9235        | 0.8167        | 0.5109        |
| Yb             | 1.3080        | 0.8271        | 0.6584        | 0.1935        |
| RDy(backward)  | -0.0924       | 0.0964        | 0.1583        | 0.3174        |
| Za             | -1.2215       | -1.4035       | -1.5082       | -1.4974       |
| Zb             | -0.6543       | -0.9455       | -1.1101       | -1.0999       |
| RDz(upward)    | -0.5672       | -0.4580       | -0.3981       | -0.3975       |
| <b>RD</b>      | <b>0.5748</b> | <b>0.4683</b> | <b>0.4285</b> | <b>0.5129</b> |
| <b>TIFI</b>    |               |               |               |               |
| <b>TIFI</b>    | 1             | 2             | 3             | 4             |
| Xa             | -0.1284       | -0.0700       | -0.0540       | 0.0389        |
| Xb             | -0.1702       | -0.1231       | -0.1081       | -0.0635       |
| RDx(leftward)  | 0.0418        | 0.0531        | 0.0541        | 0.1024        |
| Ya             | 1.2626        | 0.9735        | 0.8670        | 0.5675        |
| Yb             | 1.2771        | 0.7923        | 0.6224        | 0.1541        |
| RDy(backward)  | -0.0145       | 0.1812        | 0.2446        | 0.4134        |
| Za             | -1.3119       | -1.4918       | -1.5962       | -1.5862       |
| Zb             | -0.6095       | -0.9031       | -1.069        | -1.0587       |
| RDz(upward)    | -0.7024       | -0.5887       | -0.5272       | -0.5275       |
| <b>RD</b>      | <b>0.7038</b> | <b>0.6182</b> | <b>0.5837</b> | <b>0.6780</b> |
| <b>SIS</b>     |               |               |               |               |
| <b>SIS</b>     | 1             | 2             | 3             | 4             |
| Xa             | -0.0275       | -0.0470       | -0.0510       | -0.0496       |
| Xb             | -0.0305       | -0.1728       | -0.2294       | -0.3530       |
| RDx(leftward)  | 0.0030        | 0.1258        | 0.1784        | 0.3034        |
| Ya             | 1.304         | 0.9191        | 0.7768        | 0.3803        |
| Yb             | 1.3048        | 0.8817        | 0.7348        | 0.3296        |
| RDy(backward)  | -0.0008       | 0.0374        | 0.042         | 0.0507        |
| Za             | -0.8692       | -1.1196       | -1.2599       | -1.2513       |
| Zb             | -0.7486       | -1.0023       | -1.1456       | -1.1360       |
| RDz(upward)    | -0.1206       | -0.1173       | -0.1143       | -0.1153       |
| <b>RD</b>      | <b>0.1206</b> | <b>0.1760</b> | <b>0.2160</b> | <b>0.3285</b> |
| <b>S2AI-S1</b> |               |               |               |               |
| <b>S2AI-S1</b> | 1             | 2             | 3             | 4             |
| Xa             | 0.0498        | -0.0377       | -0.0656       | -0.1069       |
| Xb             | 0.0493        | -0.0436       | -0.0797       | -0.1077       |
| RDx(leftward)  | 0.0005        | 0.0059        | 0.0141        | 0.0008        |
| Ya             | 1.2341        | 0.8525        | 0.7139        | 0.3372        |

|                 |               |               |               |               |
|-----------------|---------------|---------------|---------------|---------------|
| Yb              | 1.2687        | 0.8369        | 0.6767        | 0.2354        |
| RDy(backward)   | -0.0346       | 0.0156        | 0.0372        | 0.1018        |
| Za              | -0.7829       | -1.0104       | -1.1526       | -1.1493       |
| Zb              | -0.7391       | -1.0091       | -1.1627       | -1.1507       |
| RDz(upward)     | -0.0438       | -0.0013       | 0.0101        | 0.0014        |
| <b>RD</b>       | <b>0.0558</b> | <b>0.0167</b> | <b>0.0410</b> | <b>0.1018</b> |
| <b>S2AI-CS1</b> |               |               |               |               |
|                 | 1             | 2             | 3             | 4             |
| Xa              | 0.0127        | -0.0233       | -0.0344       | -0.0554       |
| Xb              | -0.0323       | -0.0273       | -0.0528       | -0.0558       |
| RDx(leftward)   | 0.0450        | 0.0040        | 0.0184        | 0.0004        |
| Ya              | 1.2735        | 0.9052        | 0.7490        | 0.3453        |
| Yb              | 1.4442        | 0.8935        | 0.7100        | 0.2038        |
| RDy(backward)   | -0.1707       | 0.0117        | 0.0390        | 0.1415        |
| Za              | -0.8992       | -1.1009       | -1.2643       | -1.2584       |
| Zb              | -0.7574       | -1.0904       | -1.2645       | -1.2469       |
| RDz(upward)     | -0.1418       | -0.0105       | 0.0002        | -0.0115       |
| <b>RD</b>       | <b>0.2264</b> | <b>0.0162</b> | <b>0.0431</b> | <b>0.1420</b> |

Point a is located inside the fracture line, and point b is located outside the fracture line.

Xa and Xb respectively represent the displacement of the two points relative to the origin on the X axis. Ya and Yb respectively represent the displacement of the two points on the Y axis relative to the origin. Za and Zb respectively represent the displacement of the two points on the Z axis relative to the origin.

**LPF:** Lumbopelvic fixation ;

**TIFI:** Transiliac internal fixator ;

**SIS:** sacroiliac screw ;

**S2AI-S1:** S2-alar-iliac screw and S1 pedicle screw fixation ;

**S2AI-CS1:** S2-alar-iliac screw and contralateral S1 pedicle screw fixation.

**RDx:** The relative displacement of the two points a, b on the X axis. Leftward is a positive value

**RD<sub>y</sub>:** The relative displacement of the two points a, b on the Y axis. Backward is a positive value

**RD<sub>z</sub>:** The relative displacement of the two points a, b on the Z axis .Upward is a positive value

**RD:** The total relative displacement of two points a, b in the three-dimensional direction
