# Supplementary material for: S2-alar-iliac screw and S1 pedicle screw fixation for the treatment of non-osteoporotic sacral fractures: a finite element study
Source: Springer Nature journal article supplement (doi:10.1186/s13018-021-02805-8), 2021-10-30
Supplement: MOESM3 [file 19814166]

### Additional file 3

#### Relative displacement in flexion

| <b>LPF</b>     | 1             | 2             | 3             | 4             |
|----------------|---------------|---------------|---------------|---------------|
| Xa             | -0.1152       | -0.0280       | -0.0027       | 0.1107        |
| Xb             | -0.1465       | -0.0397       | -0.0052       | 0.0941        |
| RDx(leftward)  | 0.0313        | 0.0117        | 0.0025        | 0.0166        |
| Ya             | -0.1098       | 0.1818        | 0.2765        | 0.5241        |
| Yb             | -0.0926       | -0.0832       | -0.0795       | -0.0702       |
| RDy(backward)  | -0.0172       | 0.2650        | 0.3560        | 0.5943        |
| Za             | -0.9148       | -0.7434       | -0.6518       | -0.6498       |
| Zb             | 0.0110        | 0.0161        | 0.0195        | 0.0192        |
| RDz(upward)    | -0.9258       | -0.7595       | -0.6713       | -0.669        |
| <b>RD</b>      | <b>0.9265</b> | <b>0.8045</b> | <b>0.7599</b> | <b>0.8950</b> |
| <b>TIFI</b>    |               |               |               |               |
| <b>TIFI</b>    | 1             | 2             | 3             | 4             |
| Xa             | -0.1084       | -0.0506       | -0.0391       | 0.0791        |
| Xb             | -0.1780       | -0.0937       | -0.0624       | 0.0027        |
| RDx(leftward)  | 0.0696        | 0.0431        | 0.0233        | 0.0764        |
| Ya             | -0.2582       | 0.0586        | 0.1579        | 0.4251        |
| Yb             | 0.0032        | -0.0110       | -0.0157       | -0.0289       |
| RDy(backward)  | -0.2614       | 0.0696        | 0.1736        | 0.4540        |
| Za             | -0.8813       | -0.7005       | -0.6052       | -0.6093       |
| Zb             | -0.0281       | -0.0369       | -0.0417       | -0.0413       |
| RDz(upward)    | -0.8532       | -0.6636       | -0.5635       | -0.568        |
| <b>RD</b>      | <b>0.8951</b> | <b>0.6686</b> | <b>0.5901</b> | <b>0.7311</b> |
| <b>SIS</b>     |               |               |               |               |
| <b>SIS</b>     | 1             | 2             | 3             | 4             |
| Xa             | 0.0284        | -0.0176       | -0.0249       | -0.0387       |
| Xb             | 0.0318        | -0.1315       | -0.1851       | -0.3898       |
| RDx(leftward)  | -0.0034       | 0.1139        | 0.1602        | 0.3511        |
| Ya             | -0.0781       | 0.1141        | 0.1649        | 0.2968        |
| Yb             | -0.0164       | 0.0735        | 0.1061        | 0.1954        |
| RDy(backward)  | -0.0617       | 0.0406        | 0.0588        | 0.1014        |
| Za             | -0.4232       | -0.3329       | -0.2868       | -0.2931       |
| Zb             | -0.2494       | -0.1892       | -0.1573       | -0.1587       |
| RDz(upward)    | -0.1738       | -0.1437       | -0.1295       | -0.1344       |
| <b>RD</b>      | <b>0.1845</b> | <b>0.1878</b> | <b>0.2142</b> | <b>0.3894</b> |
| <b>S2AI-S1</b> |               |               |               |               |
| <b>S2AI-S1</b> | 1             | 2             | 3             | 4             |
| Xa             | 0.1012        | -0.0057       | -0.0392       | -0.0967       |
| Xb             | 0.0949        | -0.0132       | -0.0525       | -0.1039       |
| RDx(leftward)  | 0.0063        | 0.0075        | 0.0133        | 0.0072        |
| Ya             | -0.1546       | 0.0372        | 0.0911        | 0.2460        |

|                 |               |               |               |               |
|-----------------|---------------|---------------|---------------|---------------|
| Yb              | -0.0884       | 0.0096        | 0.0300        | 0.0865        |
| RDy(backward)   | -0.0662       | 0.0276        | 0.0611        | 0.1595        |
| Za              | -0.2778       | -0.1538       | -0.1124       | -0.1241       |
| Zb              | -0.1968       | -0.1495       | -0.1276       | -0.1276       |
| RDz(upward)     | -0.081        | -0.0043       | 0.0152        | 0.0035        |
| <b>RD</b>       | <b>0.1048</b> | <b>0.0289</b> | <b>0.0643</b> | <b>0.1597</b> |
|                 |               |               |               |               |
| <b>S2AI-CS1</b> | 1             | 2             | 3             | 4             |
| Xa              | 0.0770        | 0.0267        | 0.0102        | -0.0399       |
| Xb              | -0.0054       | 0.0259        | -0.0004       | -0.0396       |
| RDx(leftward)   | 0.0824        | 0.0008        | 0.0106        | -0.0003       |
| Ya              | -0.1863       | 0.0610        | 0.1094        | 0.2579        |
| Yb              | 0.0948        | 0.0461        | 0.0423        | 0.0323        |
| RDy(backward)   | -0.2811       | 0.0149        | 0.0671        | 0.2256        |
| Za              | -0.3760       | -0.2053       | -0.1725       | -0.1826       |
| Zb              | -0.1749       | -0.2038       | -0.2033       | -0.1963       |
| RDz(upward)     | -0.2011       | -0.0015       | 0.0308        | 0.0137        |
| <b>RD</b>       | <b>0.3553</b> | <b>0.0150</b> | <b>0.0746</b> | <b>0.2260</b> |

Point a is located inside the fracture line, and point b is located outside the fracture line.

Xa and Xb respectively represent the displacement of the two points relative to the origin on the X axis. Ya and Yb respectively represent the displacement of the two points on the Y axis relative to the origin. Za and Zb respectively represent the displacement of the two points on the Z axis relative to the origin.

**LPF:** Lumbopelvic fixation ;

**TIFI:** Transiliac internal fixator ;

**SIS:** sacroiliac screw ;

**S2AI-S1:** S2-alar-iliac screw and S1 pedicle screw fixation ;

**S2AI-CS1:** S2-alar-iliac screw and contralateral S1 pedicle screw fixation.

**RDx:** The relative displacement of the two points a, b on the X axis. Leftward is a positive value

**RD<sub>y</sub>**: The relative displacement of the two points a, b on the Y axis. Backward is a positive value

**RD<sub>z</sub>**: The relative displacement of the two points a, b on the Z axis .Upward is a positive value

**RD**: The total relative displacement of two points a, b in the three-dimensional direction
