# Supplementary material for: S2-alar-iliac screw and S1 pedicle screw fixation for the treatment of non-osteoporotic sacral fractures: a finite element study
Source: Springer Nature journal article supplement (doi:10.1186/s13018-021-02805-8), 2021-10-30
Supplement: MOESM4 [file 19814166]

## Additional file 4

### Relative displacement in right bending

|                |               |               |               |               |
|----------------|---------------|---------------|---------------|---------------|
| <b>LPF</b>     | 1             | 2             | 3             | 4             |
| Xa             | -0.1412       | -0.0608       | -0.0398       | 0.0751        |
| Xb             | -0.1829       | -0.0736       | -0.0409       | 0.0635        |
| RDx(leftward)  | 0.0417        | 0.0128        | 0.0011        | 0.0116        |
| Ya             | 1.0621        | 0.8335        | 0.7483        | 0.4998        |
| Yb             | 1.2218        | 0.7645        | 0.6045        | 0.1627        |
| RDy(backward)  | -0.1597       | 0.0690        | 0.1438        | 0.3371        |
| Za             | -1.2698       | -1.4097       | -1.4931       | -1.4826       |
| Zb             | -0.6107       | -0.8881       | -1.0448       | -1.0353       |
| RDz(upward)    | -0.6591       | -0.5216       | -0.4483       | -0.4473       |
| <b>RD</b>      | <b>0.6795</b> | <b>0.5263</b> | <b>0.4708</b> | <b>0.5602</b> |
| <b>TIFI</b>    |               |               |               |               |
|                | 1             | 2             | 3             | 4             |
| Xa             | -0.1720       | -0.0638       | -0.0328       | 0.1134        |
| Xb             | -0.2385       | -0.1596       | -0.1325       | -0.0628       |
| RDx(leftward)  | 0.0665        | 0.0958        | 0.0997        | 0.1762        |
| Ya             | 1.0186        | 0.8252        | 0.7518        | 0.5410        |
| Yb             | 1.1284        | 0.6964        | 0.5449        | 0.1278        |
| RDy(backward)  | -0.1098       | 0.1288        | 0.2069        | 0.4132        |
| Za             | -1.3591       | -1.4759       | -1.5478       | -1.5386       |
| Zb             | -0.5328       | -0.7945       | -0.9423       | -0.9331       |
| RDz(upward)    | -0.8263       | -0.6814       | -0.6055       | -0.6055       |
| <b>RD</b>      | <b>0.8362</b> | <b>0.7001</b> | <b>0.6476</b> | <b>0.7539</b> |
| <b>SIS</b>     |               |               |               |               |
|                | 1             | 2             | 3             | 4             |
| Xa             | -0.0579       | -0.0551       | -0.0479       | -0.0371       |
| Xb             | -0.0682       | -0.2238       | -0.2870       | -0.4150       |
| RDx(leftward)  | 0.0103        | 0.1687        | 0.2391        | 0.3779        |
| Ya             | 1.1762        | 0.8546        | 0.7337        | 0.3929        |
| Yb             | 1.1745        | 0.8104        | 0.6848        | 0.3383        |
| RDy(backward)  | 0.0017        | 0.0442        | 0.0489        | 0.0546        |
| Za             | -0.8339       | -1.0463       | -1.1658       | -1.1591       |
| Zb             | -0.6987       | -0.9165       | -1.0388       | -1.0302       |
| RDz(upward)    | -0.1352       | -0.1298       | -0.1270       | -0.1289       |
| <b>RD</b>      | <b>0.1356</b> | <b>0.2174</b> | <b>0.2751</b> | <b>0.4030</b> |
| <b>S2AI-S1</b> |               |               |               |               |
|                | 1             | 2             | 3             | 4             |
| Xa             | 0.0214        | -0.0412       | -0.0577       | -0.0809       |
| Xb             | 0.0157        | -0.0495       | -0.0775       | -0.0817       |
| RDx(leftward)  | 0.0057        | 0.0083        | 0.0198        | 0.0008        |
| Ya             | 1.1166        | 0.7937        | 0.6713        | 0.3437        |

|                 |               |               |               |               |
|-----------------|---------------|---------------|---------------|---------------|
| Yb              | 1.1726        | 0.7704        | 0.6235        | 0.2176        |
| RDy(backward)   | -0.0560       | 0.0233        | 0.0478        | 0.1261        |
| Za              | -0.7790       | -0.9645       | -1.0925       | -1.0905       |
| Zb              | -0.7078       | -0.9572       | -1.0967       | -1.0835       |
| RDz(upward)     | -0.0712       | -0.0073       | 0.0042        | -0.0070       |
| <b>RD</b>       | <b>0.0908</b> | <b>0.0258</b> | <b>0.0519</b> | <b>0.1263</b> |
|                 |               |               |               |               |
| <b>S2AI-CS1</b> | 1             | 2             | 3             | 4             |
| Xa              | -0.0057       | -0.0233       | -0.0252       | -0.0335       |
| Xb              | -0.0737       | -0.0270       | -0.0436       | -0.0333       |
| RDx(leftward)   | 0.0680        | 0.0037        | 0.0184        | -0.0002       |
| Ya              | 1.0965        | 0.8101        | 0.6769        | 0.3404        |
| Yb              | 1.3045        | 0.7972        | 0.6322        | 0.1766        |
| RDy(backward)   | -0.2080       | 0.0129        | 0.0447        | 0.1638        |
| Za              | -0.8697       | -1.015        | -1.1573       | -1.1533       |
| Zb              | -0.6973       | -1.0037       | -1.1591       | -1.1413       |
| RDz(upward)     | -0.1724       | -0.0113       | 0.0018        | -0.012        |
| <b>RD</b>       | <b>0.2786</b> | <b>0.0175</b> | <b>0.0484</b> | <b>0.1642</b> |

Point a is located inside the fracture line, and point b is located outside the fracture line.

Xa and Xb respectively represent the displacement of the two points relative to the origin on the X axis. Ya and Yb respectively represent the displacement of the two points on the Y axis relative to the origin. Za and Zb respectively represent the displacement of the two points on the Z axis relative to the origin.

**LPF:** Lumbopelvic fixation ;

**TIFI:** Transiliac internal fixator ;

**SIS:** sacroiliac screw ;

**S2AI-S1:** S2-alar-iliac screw and S1 pedicle screw fixation ;

**S2AI-CS1:** S2-alar-iliac screw and contralateral S1 pedicle screw fixation.

**RDx:** The relative displacement of the two points a, b on the X axis. Leftward is a positive value

**RD<sub>y</sub>:** The relative displacement of the two points a, b on the Y axis. Backward is a positive value

**RD<sub>z</sub>:** The relative displacement of the two points a, b on the Z axis .Upward is a positive value

**RD:** The total relative displacement of two points a, b in the three-dimensional direction
