# Supplementary material for: S2-alar-iliac screw and S1 pedicle screw fixation for the treatment of non-osteoporotic sacral fractures: a finite element study
Source: Springer Nature journal article supplement (doi:10.1186/s13018-021-02805-8), 2021-10-30
Supplement: MOESM5 [file 19814166]

**Additional file 5**  
**Relative displacement in left twisting**

|                |               |               |               |               |
|----------------|---------------|---------------|---------------|---------------|
| <b>LPF</b>     | 1             | 2             | 3             | 4             |
| Xa             | -0.0515       | -0.0474       | -0.0599       | 0.0123        |
| Xb             | -0.1096       | -0.0672       | -0.0607       | -0.0048       |
| RDx(leftward)  | 0.0581        | 0.0198        | 0.0008        | 0.0171        |
| Ya             | 1.0689        | 0.8258        | 0.7351        | 0.4812        |
| Yb             | 1.1318        | 0.6957        | 0.5429        | 0.1219        |
| RDy(backward)  | -0.0629       | 0.1301        | 0.1922        | 0.3593        |
| Za             | -1.2314       | -1.3871       | -1.4762       | -1.4638       |
| Zb             | -0.5795       | -0.8442       | -0.9938       | -0.9843       |
| RDz(upward)    | -0.6519       | -0.5429       | -0.4824       | -0.4795       |
| <b>RD</b>      | <b>0.6575</b> | <b>0.5586</b> | <b>0.5193</b> | <b>0.5994</b> |
| <b>TIFI</b>    |               |               |               |               |
|                | 1             | 2             | 3             | 4             |
| Xa             | -0.0272       | -0.0640       | -0.0973       | -0.0202       |
| Xb             | -0.1252       | -0.1043       | -0.1007       | -0.0731       |
| RDx(leftward)  | 0.0980        | 0.0403        | 0.0034        | 0.0529        |
| Ya             | 0.8055        | 0.6232        | 0.5519        | 0.3625        |
| Yb             | 1.1384        | 0.6938        | 0.5379        | 0.1084        |
| RDy(backward)  | -0.3329       | -0.0706       | 0.014         | 0.2541        |
| Za             | -1.2059       | -1.3318       | -1.4027       | -1.3945       |
| Zb             | -0.5656       | -0.8350       | -0.9871       | -0.9775       |
| RDz(upward)    | -0.6403       | -0.4968       | -0.4156       | -0.417        |
| <b>RD</b>      | <b>0.7283</b> | <b>0.5034</b> | <b>0.4158</b> | <b>0.4912</b> |
| <b>SIS</b>     |               |               |               |               |
|                | 1             | 2             | 3             | 4             |
| Xa             | 0.0417        | -0.0351       | -0.0696       | -0.0750       |
| Xb             | 0.0441        | -0.1011       | -0.1537       | -0.3028       |
| RDx(leftward)  | -0.0024       | 0.066         | 0.0841        | 0.2278        |
| Ya             | 1.0265        | 0.7305        | 0.6156        | 0.3033        |
| Yb             | 1.0841        | 0.7201        | 0.5941        | 0.2468        |
| RDy(backward)  | -0.0576       | 0.0104        | 0.0215        | 0.0565        |
| Za             | -0.8483       | -1.0466       | -1.1608       | -1.1524       |
| Zb             | -0.7067       | -0.9229       | -1.0455       | -1.0365       |
| RDz(upward)    | -0.1416       | -0.1237       | -0.1153       | -0.1159       |
| <b>RD</b>      | <b>0.1529</b> | <b>0.1406</b> | <b>0.1443</b> | <b>0.2618</b> |
| <b>S2AI-S1</b> |               |               |               |               |
|                | 1             | 2             | 3             | 4             |

|                 |               |               |               |               |
|-----------------|---------------|---------------|---------------|---------------|
| Xa              | 0.1313        | -0.0164       | -0.0751       | -0.1386       |
| Xb              | 0.1173        | -0.0181       | -0.0754       | -0.1385       |
| RDx(leftward)   | 0.014         | 0.0017        | 0.0003        | -0.0001       |
| Ya              | 1.0348        | 0.7274        | 0.6050        | 0.2925        |
| Yb              | 1.0857        | 0.7146        | 0.5765        | 0.1952        |
| RDy(backward)   | -0.0509       | 0.0128        | 0.0285        | 0.0973        |
| Za              | -0.7496       | -0.9306       | -1.0587       | -1.0562       |
| Zb              | -0.6915       | -0.9240       | -1.0571       | -1.0462       |
| RDz(upward)     | -0.0581       | -0.0066       | -0.0016       | -0.0100       |
| <b>RD</b>       | <b>0.0785</b> | <b>0.0145</b> | <b>0.0285</b> | <b>0.0978</b> |
| <b>S2AI-CS1</b> | 1             | 2             | 3             | 4             |
| Xa              | 0.0982        | 0.0034        | -0.0376       | -0.0820       |
| Xb              | 0.0213        | 0.0035        | -0.0393       | -0.0813       |
| RDx(leftward)   | 0.0769        | -0.0001       | 0.0017        | -0.0007       |
| Ya              | 1.0308        | 0.7527        | 0.6179        | 0.2840        |
| Yb              | 1.2282        | 0.7491        | 0.5912        | 0.1563        |
| RDy(backward)   | -0.1974       | 0.0036        | 0.0267        | 0.1277        |
| Za              | -0.8337       | -0.9872       | -1.1297       | -1.1253       |
| Zb              | -0.6877       | -0.9782       | -1.1285       | -1.1131       |
| RDz(upward)     | -0.1460       | -0.0090       | -0.0012       | -0.0122       |
| <b>RD</b>       | <b>0.2573</b> | <b>0.0097</b> | <b>0.0268</b> | <b>0.1283</b> |

Point a is located inside the fracture line, and point b is located outside the fracture line.

Xa and Xb respectively represent the displacement of the two points relative to the origin on the X axis. Ya and Yb respectively represent the displacement of the two points on the Y axis relative to the origin. Za and Zb respectively represent the displacement of the two points on the Z axis relative to the origin.

**LPF:** Lumbopelvic fixation ;

**TIFI:** Transiliac internal fixator ;

**SIS:** sacroiliac screw ;

**S2AI-S1:** S2-alar-iliac screw and S1 pedicle screw fixation ;

**S2AI-CS1:** S2-alar-iliac screw and contralateral S1 pedicle screw fixation.

**RD<sub>x</sub>:** The relative displacement of the two points a, b on the X axis. Leftward is a positive value

**RD<sub>y</sub>:** The relative displacement of the two points a, b on the Y axis. Backward is a positive value

**RD<sub>z</sub>:** The relative displacement of the two points a, b on the Z axis .Upward is a positive value

**RD:** The total relative displacement of two points a, b in the three-dimensional direction
